# Supplementary material
Source: PubMed Central journal article supplement (PMC5612381)
Supplement: NIHMS892037-supplement-supplement_1.pdf [file NIHMS892037-supplement-supplement_1.pdf]

**Supplemental Table 1. Demographic and Clinical Characteristics at Baseline of Included vs Excluded Patients Due To Failed CYP2B6 Genotyping**

| <b>Characteristic</b>                                                                    | <b>Failed Genotyping<br/>(N = 128)</b> | <b>Successful Genotyping<br/>(n = 810)</b> | <b>P-value<br/>*</b> |
|------------------------------------------------------------------------------------------|----------------------------------------|--------------------------------------------|----------------------|
| Median age (interquartile range)                                                         | 37.0 (32.5 – 45.0)                     | 37.0 (33.0 – 44.0)                         | >0.5                 |
| Male sex                                                                                 | 66 (52.0%)                             | 412 (50.9%)                                | >0.5                 |
| Median baseline CD4 count<br>(cells/mm <sup>3</sup> ) (interquartile range)              | 180.0 (92.0 –<br>239.0)                | 195.5 (113.0 –<br>256.0)                   | 0.09                 |
| Median baseline plasma HIV RNA<br>(log <sub>10</sub> copies/ml) (interquartile<br>range) | 5.0 (4.3 – 5.5)                        | 4.9 (4.2 – 5.4)                            | 0.11                 |
| History of tuberculosis                                                                  | 4 (3.6%)                               | 31 (4.3%)                                  | >0.5                 |

\* Differences in age between genotyped and non-genotyped individuals was tested with t-test assuming equal variances, differences in gender and history tuberculosis were tested with Chi-Square Test, and differences in CD4 count and log HIV RNA tested with Wilcoxon signed rank test.

Note: numbers are not identical to those for primary analyses (Figure 1) because missing data precluded some participants from being included in the primary analysis, but allowed their inclusion in secondary analyses.
